# Supplementary material
Source: Springer Nature journal article supplement (https://www.springermedizin.de/resource/supplementary/12967_2011_953_MOESM2_ESM.pdf/9577240)

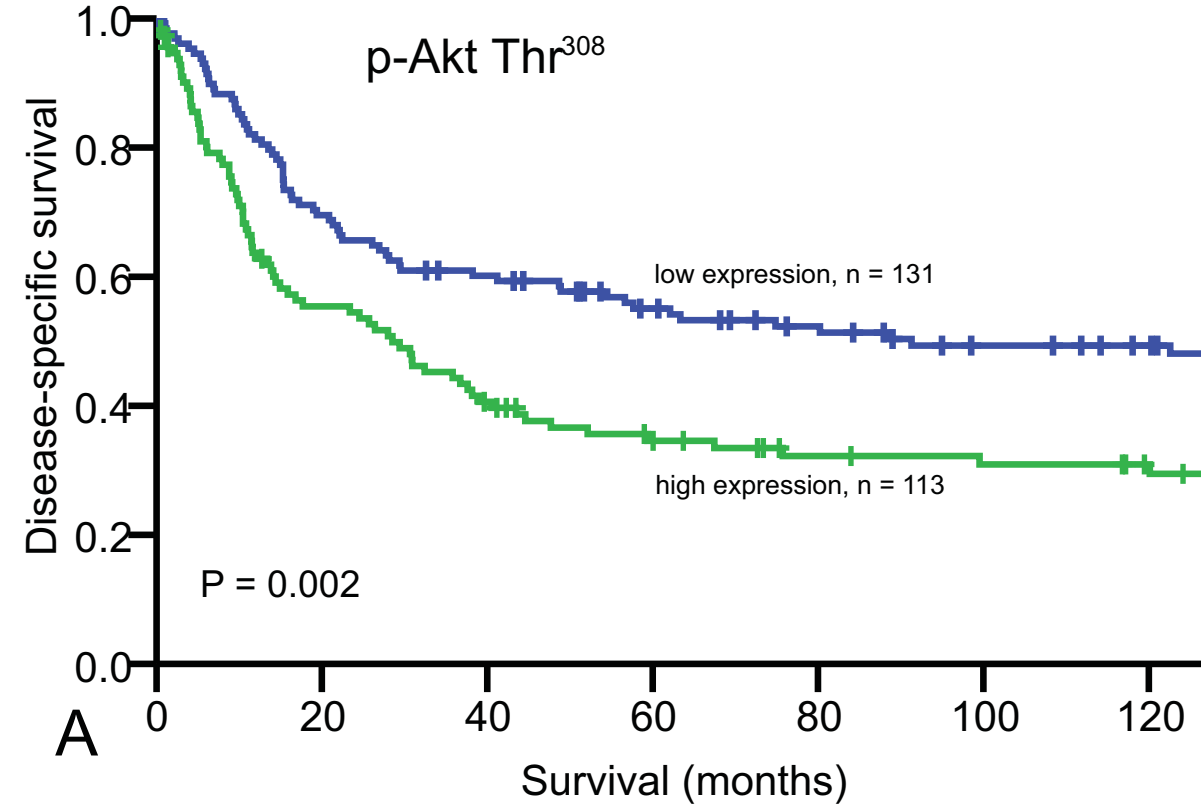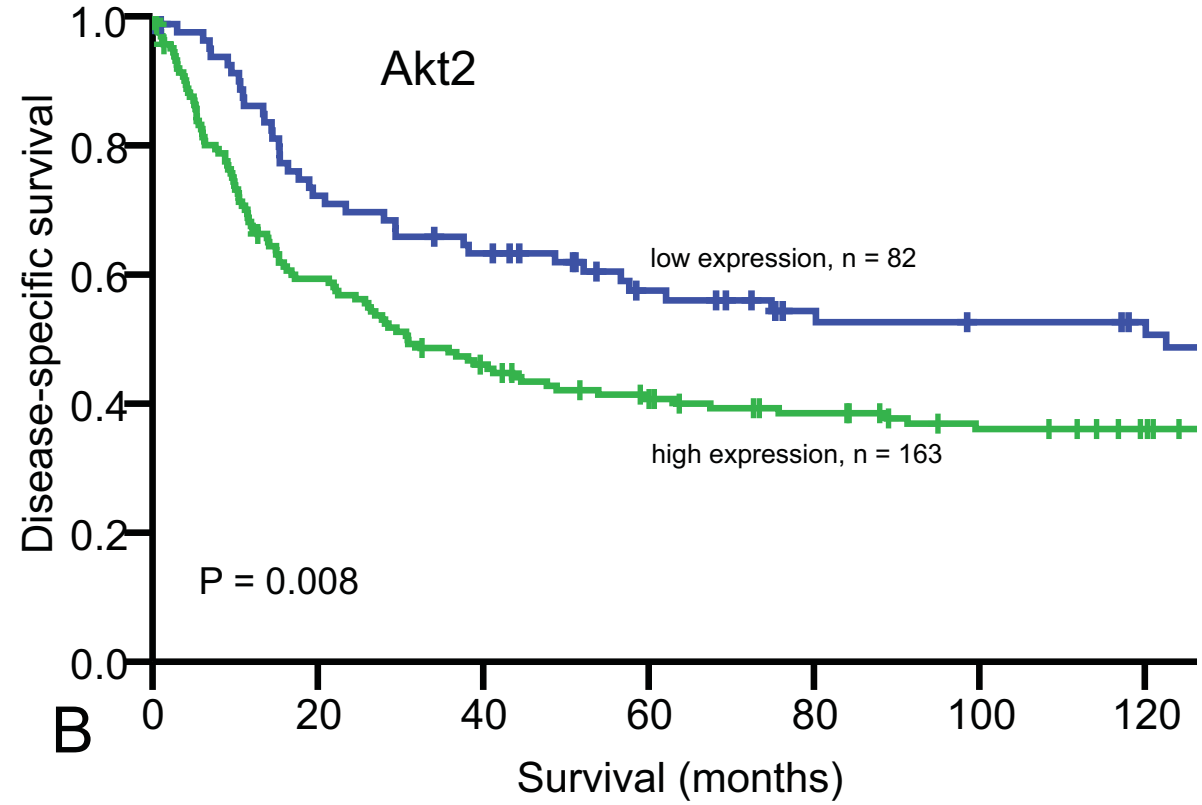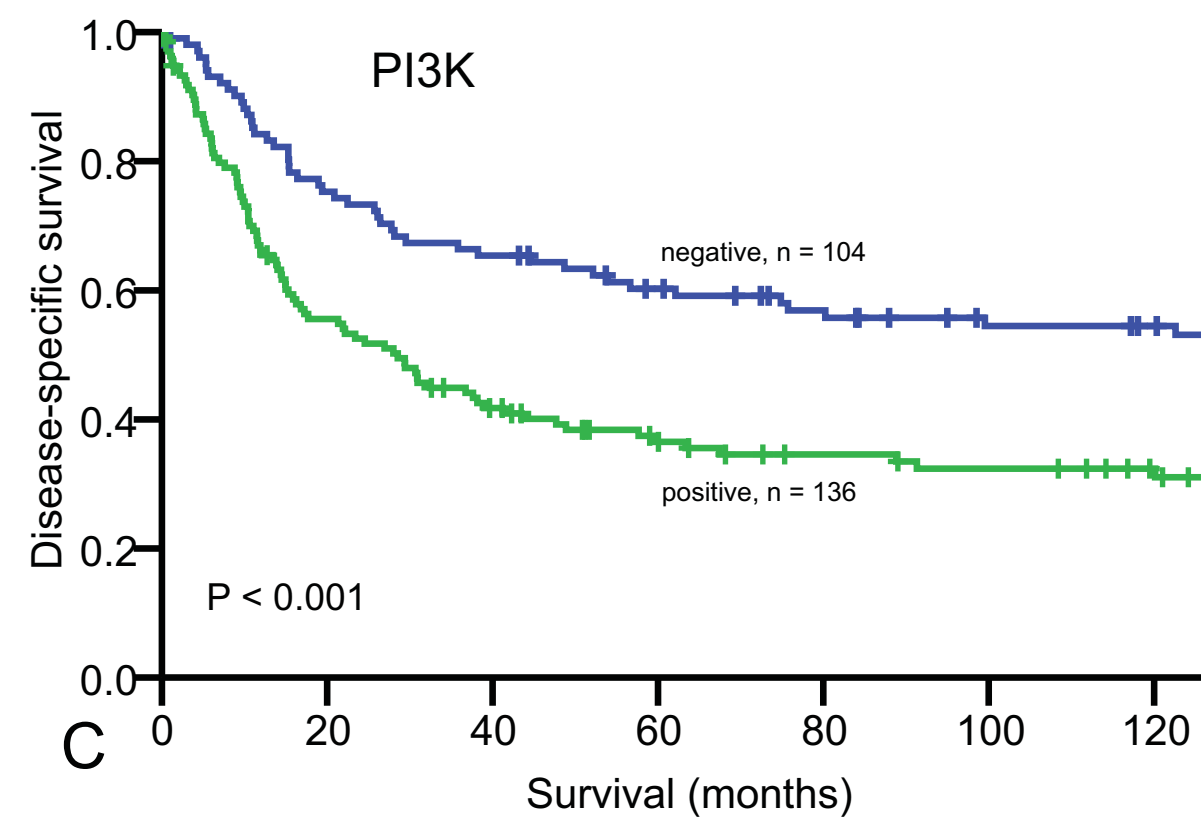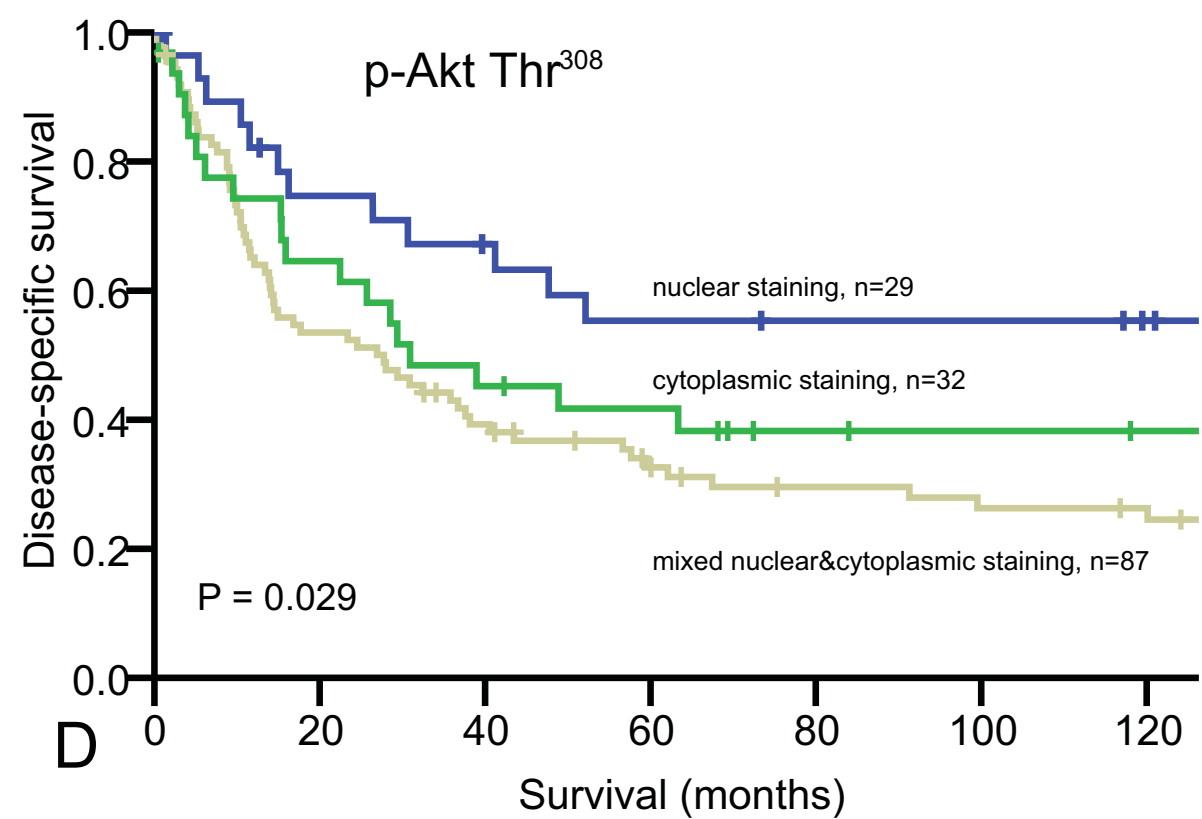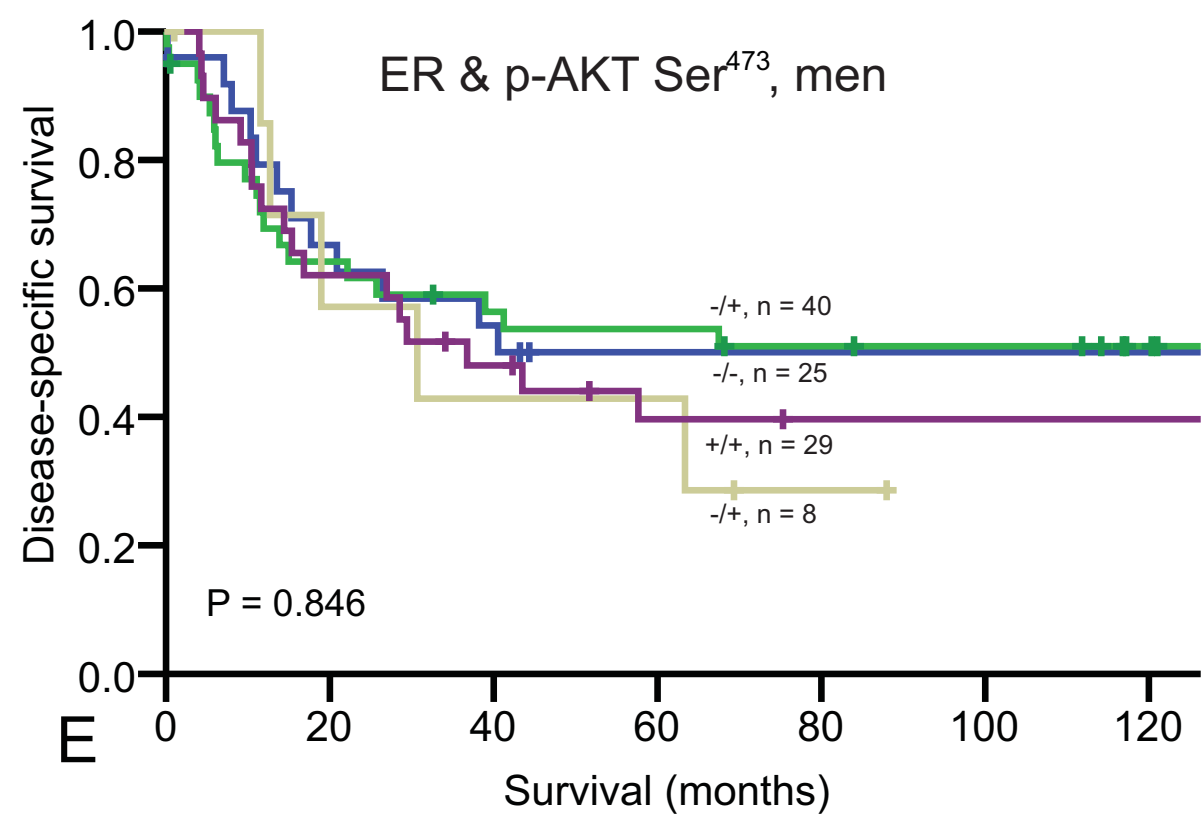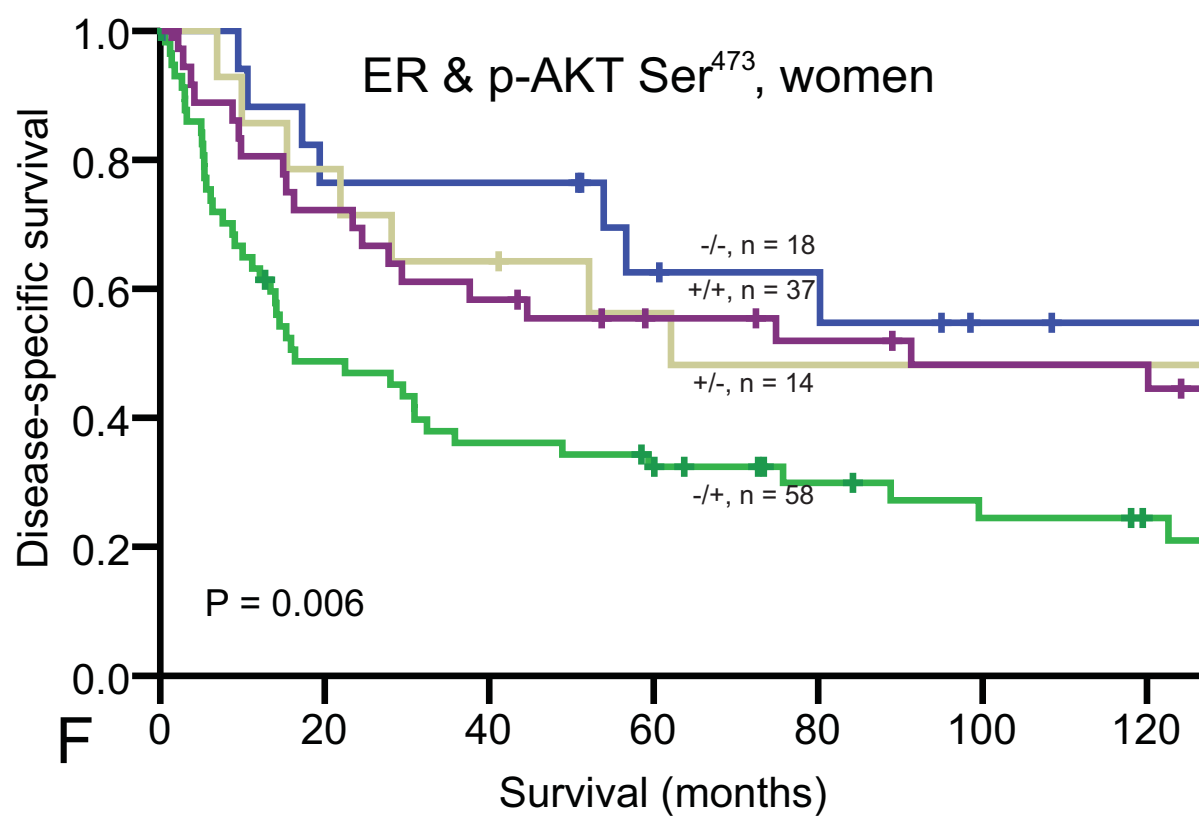

Supplement: MOESM2 [file 9577240]
